# Supplementary material for: Turkish Scorzonera Species Extracts Attenuate Cytokine Secretion via Inhibition of NF-κB Activation, Showing Anti-Inflammatory Effect in Vitro
Source: PubMed Central journal article supplement (PMC6274538; doi:10.3390/molecules21010043), 2015-12-30
Supplement: molecules-21-00043-s001.pdf [file molecules-21-00043-s001.pdf]

## Supplementary Materials: Turkish *Scorzonera* Species Extracts Attenuate Cytokine Secretion via Inhibition of NF- $\kappa$ B Activation, Showing Anti-Inflammatory Effect *in Vitro*

Özlem Bahadır Acikara, Jan Hošek, Petr Babula, Josef Cvačka, Miloš Budešínský, Martin Dračinský, Gülçin Saltan İřcan, Daniela Kadlecov, Ludmila Ballov and Karel řmejkal

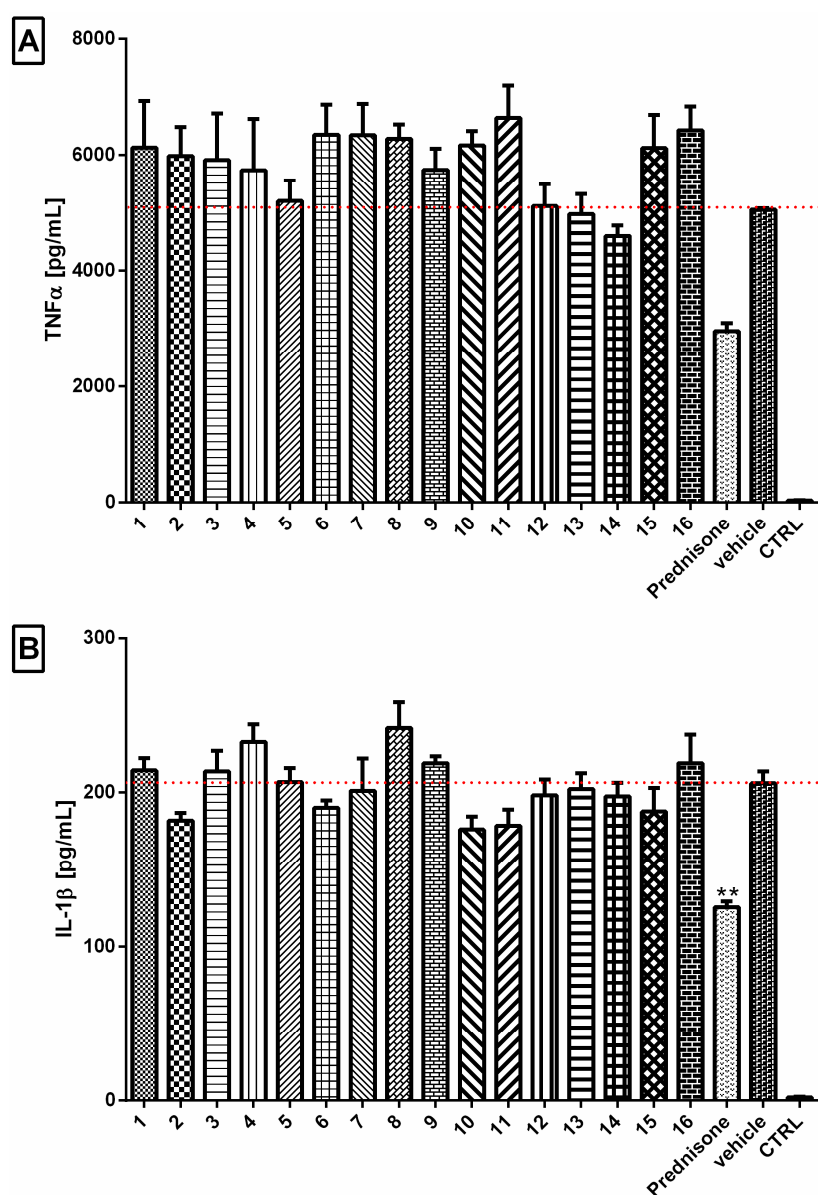

**Figure S1.** Cytokines production inhibitory activities of isolated compounds. The cells were pretreated with compounds 1–16 (10  $\mu$ M), and prednisone (1  $\mu$ M), or the vehicle (DMSO) only. After 1 h of the incubation, the inflammatory response was induced by LPS (except for the control cells). The secretion of TNF- $\alpha$  (A) and IL-1 $\beta$  (B) was measured 24 h after the LPS addition. The results are expressed as mean  $\pm$  SE for three independent experiments. \*\* Significant difference in comparison to vehicle-treated cells ( $p < 0.01$ ). Red dotted line indicates the cytokine level of DMSO treated cells.

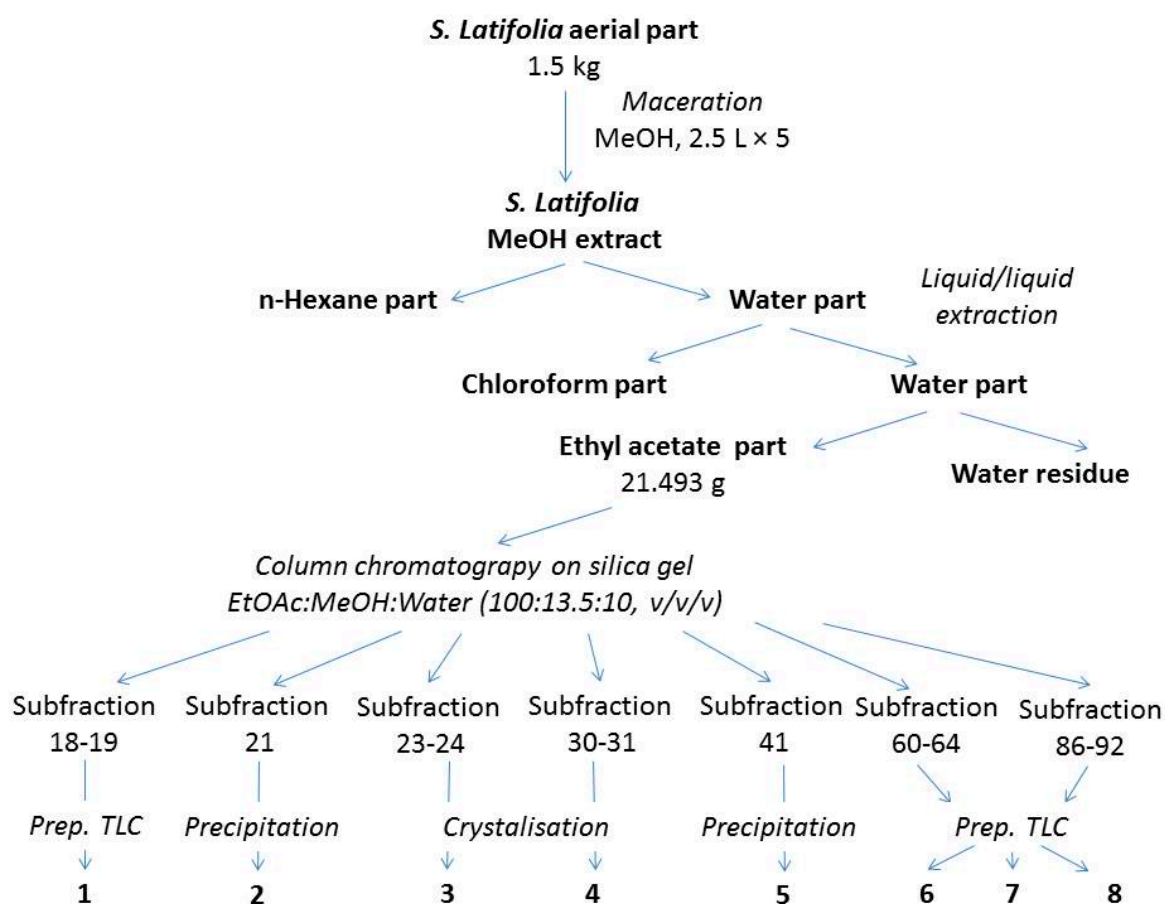

**Figure S2.** Scheme of separation of compounds 1–8.
